# Supplementary material for: A novel mouse model of hyperuricemia and gouty nephropathy
Source: PubMed Central journal article supplement — Chin Med J (Engl). 2020 Aug 20;133(16):2012–4. doi: 10.1097/CM9.0000000000000964 (PMC7462211; doi:10.1097/cm9.0000000000000964), 2020-08-20
Supplement: cm9-133-2012-s001.pdf [file cm9-133-2012-s001.pdf]

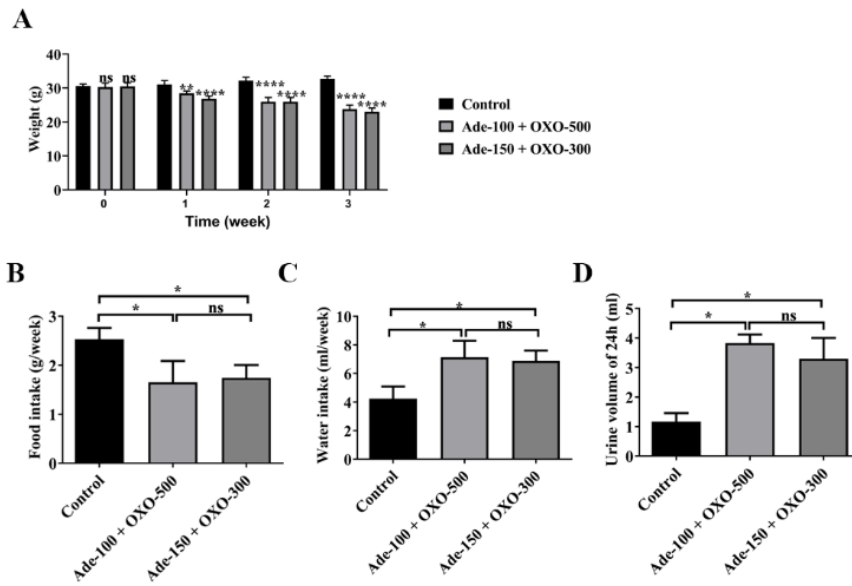

**Supplemental Figure 1:** The effects on the body weight, food and water intake, and urine output of mice treated with adenine and OXO. (A) Body weight of each group. (B) Weekly food intake of each group. (C) Weekly water intake of each group. (D) 24-hour urine volume. Data are presented as means  $\pm$  standard deviation.  $n = 6$  per group; ns, not significant.  $*P < 0.05$ ,  $**P < 0.01$ ,  $***P < 0.0001$ . Similar results from three independent experiments are shown.

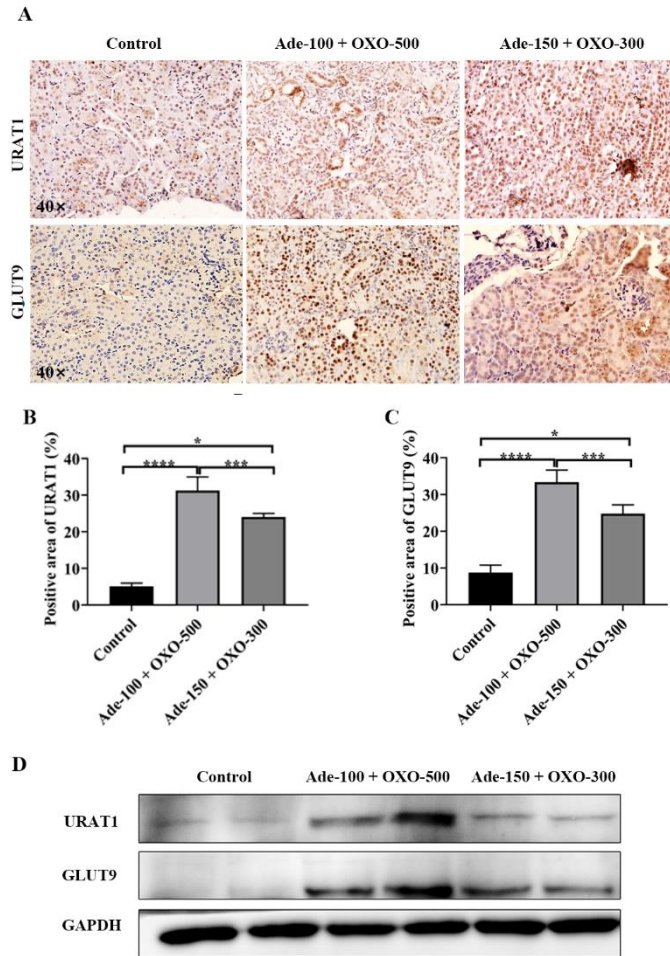

**Supplemental Figure 2:** Adenine and OXO co-stimulation increased the expression of URAT1 and GLUT9. (A) Representative histology of immunohistochemical staining of URAT1 and GLUT9 (Original magnification  $\times 40$ ). (B and C) Positive areas were measured by Image J software. (D) Western blotting analysis of URAT1 and GLUT9. Data are presented as means  $\pm$  standard deviation.  $n = 6$  per group. \* $P < 0.05$ , \*\*\* $P < 0.001$ , \*\*\*\* $P < 0.0001$ . Similar results from three independent experiments are shown.

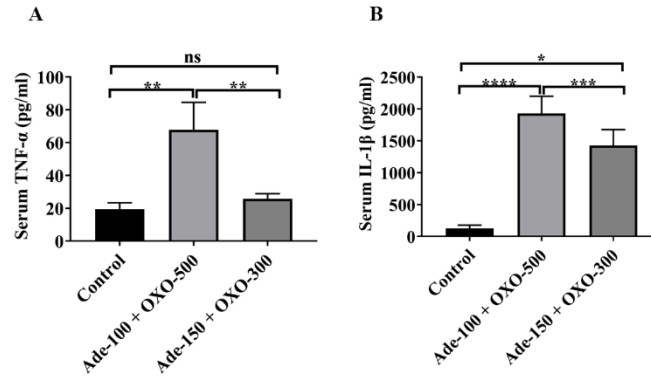

**Supplemental Figure 3:** Adenine and OXO co-stimulation induced the systemic inflammation. (A) Level of serum TNF- $\alpha$ . (B) Level of serum IL-1 $\beta$ . Data are presented as means  $\pm$  standard deviation.  $n = 6$  per group. \* $P < 0.05$ , \*\* $P < 0.01$ , \*\*\* $P < 0.001$ , \*\*\*\* $P < 0.0001$ . Similar results from three independent experiments are shown. TNF: Tumor necrosis factor; IL: Interleukin; ns: Not significant.
